# Supplementary material for: High-voltage and intrinsically safe supercapacitors based on a trimethyl phosphate electrolyte
Source: Royal Society of Chemistry journal article supplement (doi:10.1039/d1ta05584d), 2021-01-01
Supplement: d1ta05584d1.pdf [file d1ta05584d1.pdf]

***Supporting Information For:***

**High-voltage and intrinsically safe supercapacitors based on a trimethyl phosphate electrolyte**

**Hoai Van T. Nguyen<sup>a</sup>, Junam Kim<sup>a</sup>, and Kyung-Koo Lee<sup>a\*</sup>**

*<sup>a</sup> Department of Chemistry, Kunsan National University, Gunsan, Jeonbuk 54150, Korea.*

\*Corresponding author. Tel.: +82 63 469 4573.

E-mail address: [kklee@kunsan.ac.kr](mailto:kklee@kunsan.ac.kr) (K.-K. Lee)

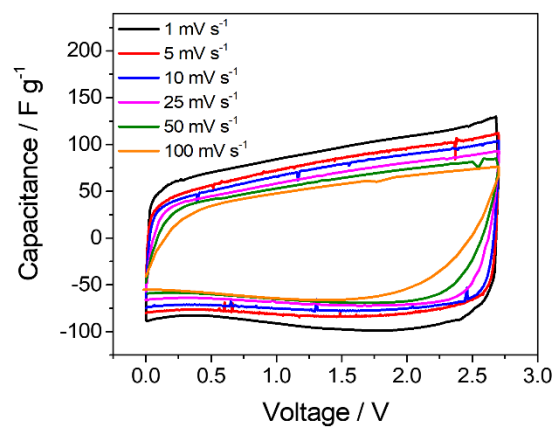

**Fig. S1.** Cyclic voltammetry of the TMP electrolyte at different scan rate ranging from 1 to 100 mV s<sup>-1</sup>.

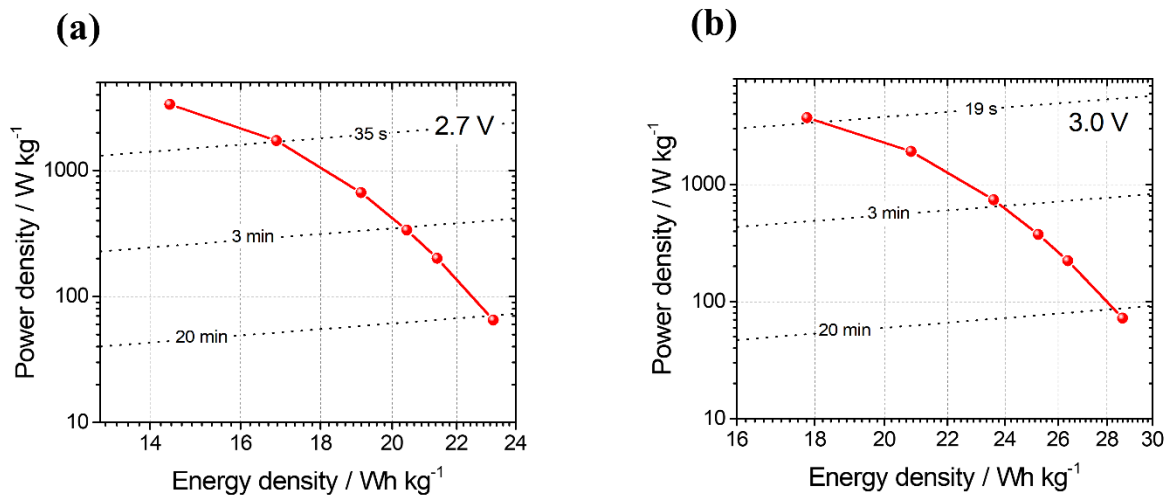

**Fig. S2.** Ragone plot of EDLCs at the cutoff voltage of 2.7 V (a) and 3.0 V (b).

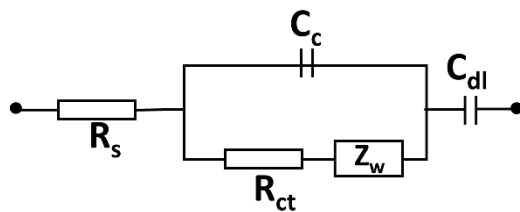

**Fig. S3.** The equivalent circuit model for the Nyquist plot; where,  $R_s$  and  $R_{ct}$  denote the electrolyte resistance and charge transfer resistance, respectively.  $C_c$  and  $C_{dl}$  indicate the interfacial contact capacitance and electric double layer capacitance, respectively.  $Z_w$  is the Warburg impedance.

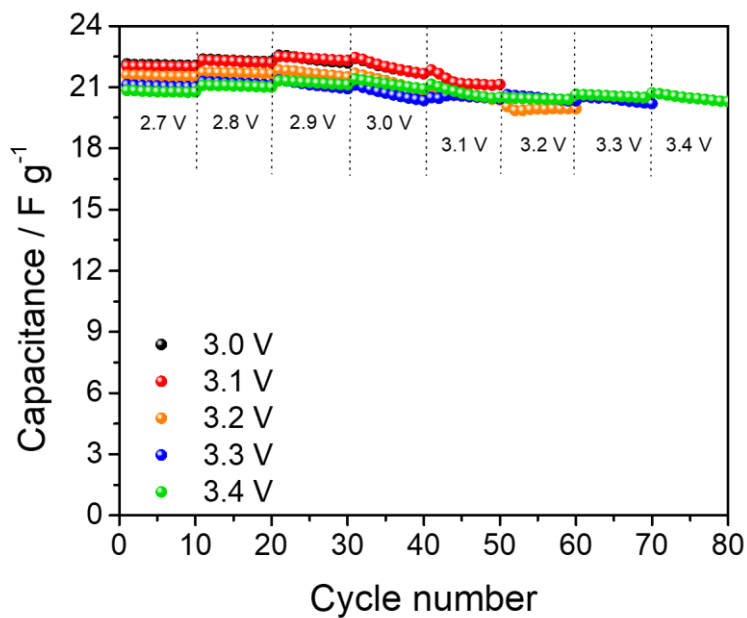

**Fig. S4.** Discharge capacitance of the cell from 2.7 V to the upper voltage.

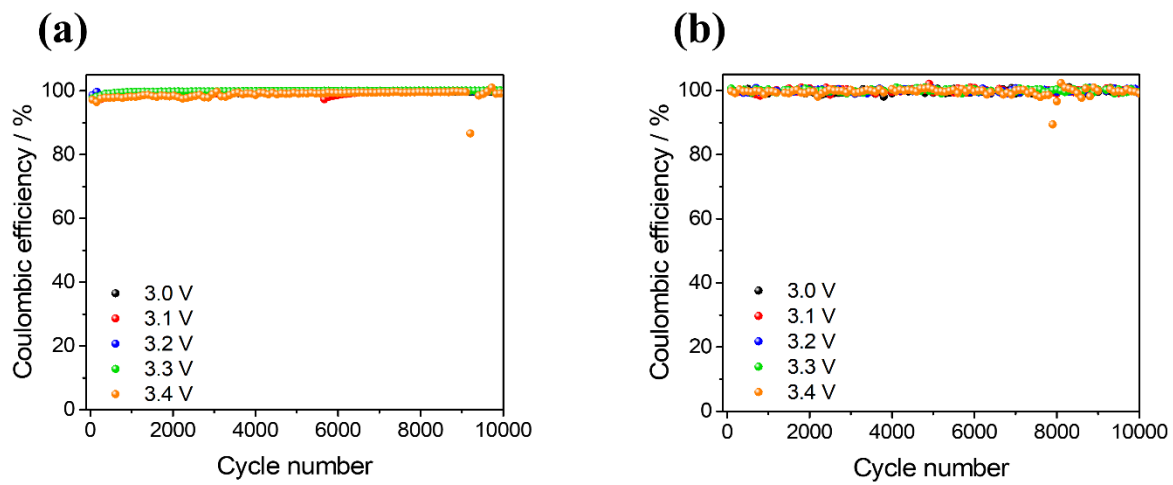

**Fig. S5.** Coulombic efficiency during charge–discharge cycling test carried out at different working voltages and a current density of 0.1 A g<sup>-1</sup> (a) and 2.5 A g<sup>-1</sup> (b).

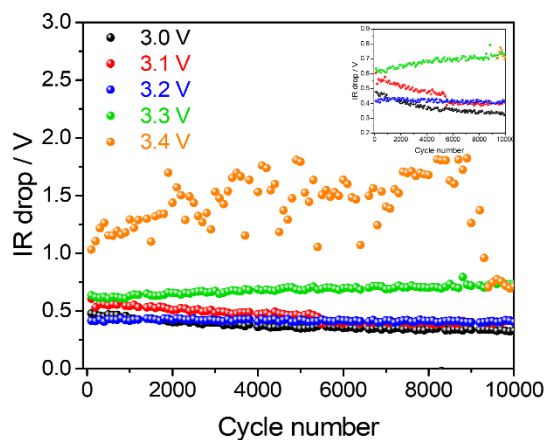

**Fig. S6.** Internal ohmic drops during charge–discharge cycling test carried out at different working voltages and a current density of  $2.5 \text{ A g}^{-1}$ .

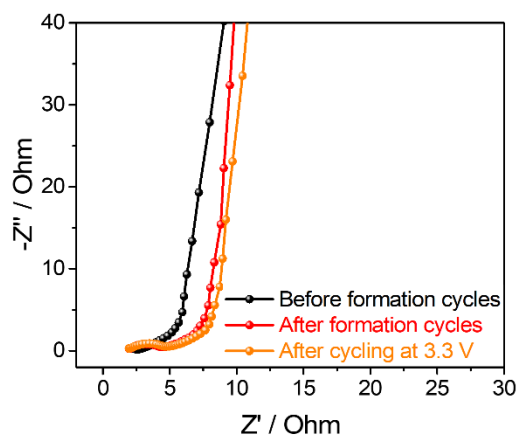

**Fig. S7.** Nyquist plots of the EDLCs before and after formation cycles, as well as after cycling test, which was performed after the formation cycles, at the voltage of 3.3 V.

**Table S1** The Van der Waals volume and effective molecular radius of the solvents<sup>a</sup>.

| Molecule | Van der Waals volume (Å <sup>3</sup> ) | Relative volume (%) | Radii (Å) | Relative radii (%) |
|----------|----------------------------------------|---------------------|-----------|--------------------|
| TPP      | 278.69                                 | 100                 | 4.05      | 100                |
| TBP      | 262.43                                 | 94.1                | 3.97      | 98.0               |
| TEP      | 162.32                                 | 58.2                | 3.38      | 83.4               |
| TMP      | 112.27                                 | 40.2                | 2.99      | 73.8               |

<sup>a</sup> All details regarding the calculation methodology are mentioned in the ref<sup>1,2</sup>.

**Table S2** The resistances and capacitance obtained from fitting of the EIS spectra.

| R <sub>s</sub> | R <sub>ct</sub> | C <sub>dl</sub> |
|----------------|-----------------|-----------------|
| 1.45 Ω         | 1.20 Ω          | 0.329 F         |

**Table S3** Comparison of properties and performances of TMP electrolyte and conventional PC, and AN-based electrolytes.

|                                           | PC-based electrolyte <sup>a</sup> | AN-based electrolyte <sup>a</sup> | TMP-based electrolyte <sup>b</sup> |
|-------------------------------------------|-----------------------------------|-----------------------------------|------------------------------------|
| Capacitance (F g <sup>-1</sup> )          | 24.0                              | 25.6                              | 23.9                               |
| Potential window (V)                      | 4.85                              | 5.07                              | 5.90                               |
| Ionic conductivity (mS cm <sup>-1</sup> ) | 12.1                              | 45.5                              | 10.0                               |
| Cycling durability (%) <sup>c</sup>       | 87.5                              | 87.9                              | 83.2                               |
| Safety (s g <sup>-1</sup> ) <sup>d</sup>  | 166                               | 138                               | 0                                  |

<sup>a</sup> Ref<sup>1,2</sup>

<sup>b</sup> This work.

<sup>c</sup> Capacitance retention of the cells with the given electrolyte systems after floating test for 1000 h at a voltage of 3.0 V.

<sup>d</sup> The safety of the electrolyte was determined by the SET values. The SET values were defined by normalizing the combustion time against the electrolyte mass (refer to characterization section).



## REFERENCE

1. H. V. T. Nguyen, K. Kwak and K. K. Lee, *Electrochim. Acta*, 2019, **299**, 98-106.
2. H. V. Nguyen, A. Bin Faheem, K. Kwak and K. K. Lee, *J. Power Sources*, 2020, **463**, 10.
